# Supplementary material
Source: PubMed Central journal article supplement (PMC3310223)

# **SUPPLEMENTAL MATERIAL**

**Supplemental Table 1. Baseline Features of the WHI-OS Cohort According to DHA+EPA Acid Quartiles**

|                                      | DHA+EPA Intake (g/1000 kcal) |             |       |             |       |             |       |             | p-value |
|--------------------------------------|------------------------------|-------------|-------|-------------|-------|-------------|-------|-------------|---------|
|                                      | Q1                           | Q2          |       | Q3          |       | Q4          |       |             |         |
| Age (years)                          | 20962                        | 63.6 (7.5)  | 21442 | 63.6 (7.4)  | 20945 | 63.5 (7.3)  | 21144 | 63.5 (7.2)  | 0.026   |
| Ethnicity                            |                              |             |       |             |       |             |       |             | <0.001  |
| White                                | 18127                        | 86          | 18491 | 85          | 17723 | 84          | 17204 | 80          |         |
| African American                     | 1167                         | 6           | 1466  | 7           | 1650  | 8           | 1870  | 9           |         |
| Hispanic                             | 1012                         | 5           | 763   | 4           | 619   | 3           | 503   | 2           |         |
| American Indian / AK                 | 122                          | 1           | 83    | 0.4         | 71    | 0.3         | 64    | 0.3         |         |
| Asian / Pacific Islander             | 272                          | 1           | 368   | 2           | 610   | 3           | 1163  | 6           |         |
| Unknown                              | 262                          | 1           | 271   | 1           | 272   | 1           | 340   | 2           |         |
| Diabetes (%yes)                      | 755                          | 4           | 889   | 4           | 827   | 4           | 771   | 4           | 0.009   |
| CAD (%yes)                           | 616                          | 3           | 639   | 3           | 618   | 3           | 638   | 3           | 0.966   |
| Atrial fibrillation (%yes)           | 963                          | 5           | 963   | 5           | 893   | 4           | 879   | 4           | 0.106   |
| Body mass index (kg/m <sup>2</sup> ) | 20962                        | 27 (6)      | 21442 | 28 (6)      | 20945 | 27 (6)      | 21144 | 27 (6)      | <0.001  |
| HDL-cholesterol* (mg/dl)             | 242                          | 61 (16)     | 272   | 64 (17)     | 226   | 63 (17)     | 215   | 68 (19)     | 0.001   |
| Triglycerides* (mg/dl)               | 242                          | 153 (80)    | 273   | 153 (85)    | 226   | 149 (93)    | 215   | 139 (91)    | 0.339   |
| Systolic Blood Pressure              | 20952                        | 127 (18)    | 21429 | 127 (18)    | 20924 | 127 (18)    | 21127 | 126 (17)    | <0.001  |
| Alcohol use (%)                      |                              |             |       |             |       |             |       |             | <0.001  |
| Never drinker                        | 3159                         | 15          | 2376  | 10          | 1845  | 9           | 1754  | 9           |         |
| Past drinker                         | 4712                         | 23          | 3958  | 19          | 3498  | 17          | 3255  | 15          |         |
| Current drinker                      | 13091                        | 63          | 15108 | 71          | 15602 | 74          | 16135 | 76          |         |
| Smoking status (%)                   |                              |             |       |             |       |             |       |             | <0.001  |
| Never                                | 11296                        | 54          | 11096 | 52          | 10421 | 50          | 10067 | 48          |         |
| Former                               | 8173                         | 39          | 8868  | 41          | 9310  | 44          | 10095 | 47          |         |
| Current                              | 1493                         | 7           | 1478  | 7           | 1214  | 6           | 982   | 5           |         |
| Physical activity (METs/wk)          | 20962                        | 12 (14)     | 21442 | 13 (14)     | 20945 | 14 (14)     | 21144 | 16 (15)     | <0.001  |
| Education (%)                        |                              |             |       |             |       |             |       |             | <0.001  |
| ≤ High school / GED                  | 5611                         | 27          | 4867  | 23          | 3891  | 19          | 3060  | 15          |         |
| Some college                         | 8048                         | 38          | 8171  | 38          | 7582  | 36          | 6939  | 32          |         |
| College graduate                     | 7303                         | 35          | 8404  | 39          | 9472  | 45          | 11145 | 53          |         |
| Energy intake (kcal/day)             | 20962                        | 1606        | 21442 | 1636        | 20945 | 1580        | 21144 | 1464        | <0.001  |
| Fiber intake (g/1000 kcal)           | 20962                        | 11 (4)      | 21442 | 11 (4)      | 20945 | 11 (4)      | 21144 | 12 (4)      | <0.001  |
| Fruit and Vegetable intake           | 20962                        | 4 (2)       | 21442 | 4 (2)       | 20945 | 5 (2)       | 21144 | 5 (2)       | <0.001  |
| SFA intake (%kcal)                   | 20962                        | 10.6 (3.6)  | 21442 | 10.4 (3.3)  | 20945 | 10.0 (3.1)  | 21144 | 9.0 (3.0)   | <0.001  |
| TFA intake (%kcal)                   | 20962                        | 2.3 (1.2)   | 21442 | 2.2 (1.1)   | 20945 | 2.0 (1.0)   | 21144 | 1.7 (0.9)   | <0.001  |
| DHA+EPA intake (%kcal)               | 20962                        | 0.02 (0.01) | 21442 | 0.04 (0.01) | 20945 | 0.07 (0.01) | 21144 | 0.17 (0.09) | <0.001  |

|                                 |       |             |       |             |       |            |       |             |        |
|---------------------------------|-------|-------------|-------|-------------|-------|------------|-------|-------------|--------|
| ALA intake (%kcal)              | 20962 | 5.6 (2.1)   | 21442 | 5.7 (1.9)   | 20945 | 5.6 (1.8)  | 21144 | 5.2 (1.8)   | <0.001 |
| $\alpha$ -Linoleic Acid (%kcal) | 20962 | 0.65 (0.27) | 21442 | 0.67 (0.26) | 20945 | 0.68 (0.3) | 21144 | 0.68 (0.27) | <0.001 |

\* WHI blood subsample participants only (n=955). Means and SD's weighted by ethnicity.

**Supplemental Table 2. Baseline Features of the WHI-OS Cohort According to ALA Quartiles**

|                                      | ALA Intake (g/1000 kcal) |             |       |             |       |             |       |             | p-value |
|--------------------------------------|--------------------------|-------------|-------|-------------|-------|-------------|-------|-------------|---------|
|                                      | Q1                       | Q2          | Q3    | Q4          |       |             |       |             |         |
| Age (years)                          | 21243                    | 63.2 (7.4)  | 21169 | 63.4 (7.3)  | 21094 | 63.7 (7.4)  | 20987 | 63.9 (7.4)  | <0.001  |
| Ethnicity                            |                          |             |       |             |       |             |       |             | <0.001  |
| White                                | 18924                    | 89          | 18360 | 87          | 17663 | 84          | 16598 | 78          |         |
| African American                     | 974                      | 5           | 1345  | 6           | 1713  | 8           | 2121  | 10          |         |
| Hispanic                             | 677                      | 3           | 659   | 3           | 720   | 3           | 841   | 4           |         |
| American Indian / AK                 | 82                       | 0.4         | 81    | 0.4         | 82    | 0.4         | 95    | 0.5         |         |
| Asian / Pacific Islander             | 306                      | 1           | 459   | 2           | 645   | 3           | 1003  | 5           |         |
| Unknown                              | 280                      | 1           | 265   | 1           | 271   | 1           | 329   | 2           |         |
| Diabetes (%yes)                      | 560                      | 3           | 764   | 4           | 891   | 4           | 1027  | 5           | <0.001  |
| CAD (%yes)                           | 709                      | 3           | 600   | 3           | 629   | 3           | 573   | 3           | 0.001   |
| Atrial fibrillation (%yes)           | 872                      | 4           | 936   | 4           | 922   | 4           | 968   | 5           | 0.084   |
| Body mass index (kg/m <sup>2</sup> ) | 21243                    | 27 (5)      | 21169 | 27 (6)      | 21094 | 27 (6)      | 20987 | 28 (6)      | <0.001  |
| HDL-cholesterol* (mg/dl)             | 216                      | 62 (15)     | 239   | 62 (17)     | 236   | 66 (19)     | 264   | 64 (18)     | 0.078   |
| Triglycerides* (mg/dl)               | 216                      | 149 (73)    | 239   | 154 (81)    | 236   | 143 (80)    | 265   | 151 (121)   | 0.608   |
| Systolic Blood Pressure              | 21229                    | 126 (18)    | 21160 | 127 (18)    | 21072 | 127 (18)    | 20971 | 128 (18)    | <0.001  |
| Alcohol use (%)                      |                          |             |       |             |       |             |       |             | <0.001  |
| Never drinker                        | 1979                     | 9           | 2194  | 10          | 2336  | 11          | 2625  | 13          |         |
| Past drinker                         | 3822                     | 18          | 3692  | 17          | 3840  | 18          | 4069  | 19          |         |
| Current drinker                      | 15442                    | 73          | 15283 | 73          | 14918 | 71          | 14293 | 68          |         |
| Smoking status (%)                   |                          |             |       |             |       |             |       |             | <0.001  |
| Never                                | 10819                    | 51          | 10850 | 51          | 10849 | 51          | 10362 | 49          |         |
| Former                               | 9438                     | 44          | 9183  | 43          | 8887  | 42          | 8938  | 43          |         |
| Current                              | 986                      | 5           | 1136  | 6           | 1358  | 7           | 1687  | 8           |         |
| Physical activity (METs/wk)          | 21243                    | 16 (15)     | 21169 | 14 (14)     | 21094 | 13 (14)     | 20987 | 12 (14)     | <0.001  |
| Education (%)                        |                          |             |       |             |       |             |       |             | <0.001  |
| ≤ High school / GED                  | 3821                     | 18          | 4157  | 20          | 4586  | 22          | 4865  | 23          |         |
| Some college                         | 7475                     | 35          | 7775  | 36          | 7735  | 37          | 7755  | 37          |         |
| College graduate                     | 9947                     | 47          | 9237  | 44          | 8773  | 41          | 8367  | 40          |         |
| Energy intake (kcal/day)             | 21243                    | 1518        | 21169 | 1583        | 21094 | 1603        | 20987 | 1583        | <0.001  |
| Fiber intake (g/1000 kcal)           | 21243                    | 12 (4)      | 21169 | 11 (4)      | 21094 | 11 (4)      | 20987 | 10 (4)      | <0.001  |
| Fruit and Vegetable intake           | 21243                    | 5 (2)       | 21169 | 4 (2)       | 21094 | 4 (2)       | 20987 | 4 (2)       | <0.001  |
| SFA intake (%kcal)                   | 21243                    | 8.2 (2.8)   | 21169 | 9.8 (3.0)   | 21094 | 10.6 (3.2)  | 20987 | 11.3 (3.4)  | <0.001  |
| TFA intake (%kcal)                   | 21243                    | 1.6 (0.7)   | 21169 | 2.0 (0.9)   | 21094 | 2.3 (1.1)   | 20987 | 2.4 (1.3)   | <0.001  |
| DHA+EPA intake (%kcal)               | 21243                    | 0.07 (0.08) | 21169 | 0.08 (0.07) | 21094 | 0.08 (0.07) | 20987 | 0.08 (0.08) | <0.001  |
| ALA intake (%kcal)                   | 21243                    | 3.9 (1.1)   | 21169 | 5.0 (1.1)   | 21094 | 5.8 (1.2)   | 20987 | 7.4 (2.0)   | <0.001  |

---

|                                 |       |             |       |             |       |             |       |             |        |
|---------------------------------|-------|-------------|-------|-------------|-------|-------------|-------|-------------|--------|
| $\alpha$ -Linoleic Acid (%kcal) | 21243 | 0.40 (0.06) | 21169 | 0.55 (0.04) | 21094 | 0.71 (0.05) | 20987 | 1.04 (0.23) | <0.001 |
|---------------------------------|-------|-------------|-------|-------------|-------|-------------|-------|-------------|--------|

\* WHI blood subsample participants only (n=955). Means and SD's weighted by ethnicity.

**Supplemental Table 3. Baseline Features of the WHI-OS Cohort According to TFA Quartiles**

|                                      | TFA Intake (g/1000 kcal) |            |       |            |       |            |       |            | p-     |
|--------------------------------------|--------------------------|------------|-------|------------|-------|------------|-------|------------|--------|
|                                      | Q1                       |            | Q2    |            | Q3    |            | Q4    |            |        |
| Age (years)                          | 21183                    | 63.3 (7.3) | 21148 | 63.5 (7.4) | 21137 | 63.6 (7.3) | 21025 | 63.8 (7.4) | <0.001 |
| Ethnicity                            |                          |            |       |            |       |            |       |            | <0.001 |
| White                                | 18174                    | 85         | 18140 | 85         | 17779 | 84         | 17452 | 83         |        |
| African American                     | 925                      | 4          | 1179  | 6          | 1673  | 8          | 2376  | 11         |        |
| Hispanic                             | 751                      | 4          | 771   | 4          | 775   | 4          | 600   | 3          |        |
| American Indian / AK                 | 56                       | 0.3        | 90    | 0.4        | 105   | 0.5        | 89    | 0.4        |        |
| Asian / Pacific Islander             | 914                      | 4          | 679   | 3          | 539   | 3          | 281   | 1          |        |
| Unknown                              | 363                      | 2          | 389   | 1          | 266   | 1          | 227   | 1          |        |
| Diabetes (%yes)                      | 513                      | 2          | 705   | 3          | 901   | 4          | 1123  | 5          | <0.001 |
| CAD (%yes)                           | 644                      | 3          | 587   | 3          | 599   | 3          | 681   | 3          | 0.021  |
| Atrial fibrillation (%yes)           | 840                      | 4          | 930   | 4          | 916   | 4          | 1012  | 5          | <0.001 |
| Body mass index (kg/m <sup>2</sup> ) | 21183                    | 26 (5)     | 21148 | 27 (5)     | 21137 | 28 (6)     | 21025 | 28 (6)     | <0.001 |
| HDL-cholesterol* (mg/dl)             | 222                      | 65 (17)    | 229   | 64 (17)    | 254   | 65 (18)    | 250   | 62 (16)    | 0.084  |
| Triglycerides* (mg/dl)               | 222                      | 138 (72)   | 229   | 143 (75)   | 255   | 156 (82)   | 250   | 158 (118)  | 0.075  |
| Systolic Blood Pressure              | 21183                    | 125 (18)   | 21138 | 126 (18)   | 21127 | 127 (18)   | 21009 | 128 (18)   | <0.001 |
| Alcohol use (%)                      |                          |            |       |            |       |            |       |            | <0.001 |
| Never drinker                        | 1854                     | 9          | 2048  | 10         | 2444  | 12         | 2788  | 13         |        |
| Past drinker                         | 3478                     | 16         | 3537  | 17         | 3925  | 18         | 4483  | 22         |        |
| Current drinker                      | 15851                    | 75         | 15563 | 73         | 14768 | 70         | 13754 | 65         |        |
| Smoking status (%)                   |                          |            |       |            |       |            |       |            | <0.001 |
| Never                                | 10285                    | 49         | 10634 | 50         | 10946 | 52         | 11015 | 52         |        |
| Former                               | 10155                    | 48         | 9395  | 45         | 8738  | 41         | 8158  | 39         |        |
| Current                              | 743                      | 3          | 1119  | 5          | 1453  | 7          | 1852  | 9          |        |
| Physical activity (METs/wk)          | 21183                    | 19 (16)    | 21148 | 15 (14)    | 21137 | 12 (13)    | 21025 | 10 (120)   | <0.001 |
| Education (%)                        |                          |            |       |            |       |            |       |            | <0.001 |
| ≤ High school / GED                  | 2781                     | 13         | 3554  | 17         | 4773  | 23         | 6321  | 30         |        |
| Some college                         | 6929                     | 33         | 7579  | 36         | 7914  | 37         | 8318  | 40         |        |
| College graduate                     | 11473                    | 54         | 10015 | 47         | 8450  | 40         | 6386  | 30         |        |
| Energy intake (kcal/day)             | 21183                    | 1394 (474) | 21148 | 1527 (537) | 21137 | 1648 (623) | 21025 | 1722 (686) | <0.001 |
| Fiber intake (g/1000 kcal)           | 21183                    | 14 (4)     | 21148 | 11 (3)     | 21137 | 10 (3)     | 21025 | 9 (3)      | <0.001 |
| Fruit and Vegetable intake           | 21183                    | 5 (2)      | 21148 | 5 (2)      | 21137 | 4 (2)      | 21025 | 3 (2)      | <0.001 |
| SFA intake (%kcal)                   | 21183                    | 7.1 (2.3)  | 21148 | 9.6 (2.6)  | 21137 | 11.1 (3.1) | 21025 | 12.1 (2.9) | <0.001 |
| TFA intake (%kcal)                   | 21183                    | 1.0 (0.2)  | 21148 | 1.6 (0.2)  | 21137 | 2.2 (0.2)  | 21025 | 3.5 (0.9)  | <0.001 |

|                                 |       |             |       |             |       |             |       |             |        |
|---------------------------------|-------|-------------|-------|-------------|-------|-------------|-------|-------------|--------|
| DHA+EPA intake (%kcal)          | 21183 | 0.10 (0.10) | 21148 | 0.08 (0.07) | 21137 | 0.07 (0.06) | 21025 | 0.06 (0.06) | <0.001 |
| ALA intake (%kcal)              | 21183 | 4.3 (1.6)   | 21148 | 5.1 (1.6)   | 21137 | 5.8 (1.6)   | 21025 | 7.0 (1.8)   | <0.001 |
| $\alpha$ -Linoleic Acid (%kcal) | 21183 | 0.61 (0.29) | 21148 | 0.63 (0.25) | 21137 | 0.68 (0.25) | 21025 | 0.77 (0.26) | <0.001 |

\* WHI blood subsample participants only (n=955). Means and SD's weighted by ethnicity.

**Supplemental Table 4. Multivariate hazard ratios for incident HF based on baked/broiled and fried fish categories**

|                                           | <1/month | 1-3/month         | 1-2/week          | 3-4/week          | ≥5/week           | Trend P-value |
|-------------------------------------------|----------|-------------------|-------------------|-------------------|-------------------|---------------|
| <b>Baked/broiled fish</b>                 |          |                   |                   |                   |                   |               |
| Number of participants                    | 11700    | 26344             | 35034             | 8109              | 3306              |               |
| Person-years                              | 110243   | 253778            | 346142            | 80016             | 32282             |               |
| Number of HF events                       | 294      | 646               | 700               | 167               | 51                |               |
| Incidence Rates (per 10,000 person-years) | 26.7     | 25.5              | 20.2              | 20.9              | 19.4              |               |
| Model 1*                                  | 1.00     | 1.04 (0.90, 1.19) | 0.91 (0.79, 1.05) | 1.03 (0.85, 1.25) | 0.76 (0.56, 1.02) | 0.073         |
| Model 2†                                  | 1.00     | 1.03 (0.89, 1.18) | 0.89 (0.77, 1.02) | 0.99 (0.81, 1.21) | 0.71 (0.52, 0.96) | 0.022         |
| Model 3§                                  | 1.00     | 1.03 (0.89, 1.18) | 0.89 (0.77, 1.02) | 0.99 (0.80, 1.21) | 0.70 (0.51, 0.95) | 0.022         |
|                                           | <1/month | 1-3/month         | ≥1/week           |                   |                   |               |
| <b>Fried Fish</b>                         |          |                   |                   |                   |                   |               |
| Number of participants                    | 63609    | 18015             | 2869              |                   |                   |               |
| Person-years                              | 625924   | 170610            | 25928             |                   |                   |               |
| Number of HF events                       | 1305     | 451               | 102               |                   |                   |               |
| Incidence Rates (per 10,000 person-years) | 20.8     | 26.4              | 39.4              |                   |                   |               |
| Model 1*                                  | 1.00     | 1.09 (0.97, 1.21) | 1.50 (1.22, 1.84) |                   |                   | <.001         |
| Model 2‡                                  | 1.00     | 1.07 (0.96, 1.20) | 1.52 (1.23, 1.88) |                   |                   | 0.001         |
| Model 3§                                  | 1.00     | 1.06 (0.95, 1.19) | 1.48 (1.19, 1.84) |                   |                   | 0.005         |

\*Adjusted for age, ethnicity, education, physical activity, smoking, alcohol, diabetes, hypertension, AF, MI/CABG/PTCA, BMI, time-dependent MI

†Model 1 + fiber, fruit/vegetable servings, fried fish servings, saturated fat intake (%), DHA+EPA (%), linolenic acid (ALA, %), linoleic acid (%)

‡Model 1 + fiber, fruit/vegetable servings, non-fried fish servings, saturated fat intake (%), DHA+EPA (%), linolenic acid (ALA, %), linoleic acid (%)

§Model 2 + fried food servings, sodium intake (mg)



**Supplemental Table 5. Multivariate hazard ratios for incident HF based on Subtype of Baked/Broiled Fish (White Fish, Dark Fish, Tuna Fish)**

|                                               | <1/month | 1-3/month         | ≥1/week           | Trend P-value |
|-----------------------------------------------|----------|-------------------|-------------------|---------------|
| <b>White fish (sole, snapper, cod)</b>        |          |                   |                   |               |
| Number of participants                        | 45161    | 32327             | 7005              |               |
| Person-years                                  | 433704   | 319729            | 69029             |               |
| Number of HF events                           | 1064     | 653               | 141               |               |
| Incidence Rates (per 10,000 person-years)     | 24.5     | 20.4              | 20.4              |               |
| Model 1*                                      | 1.00     | 0.92 (0.83, 1.02) | 0.97 (0.81, 1.16) | 0.234         |
| Model 2†                                      | 1.00     | 0.91 (0.82, 1.01) | 0.95 (0.79, 1.14) | 0.155         |
| Model 3‡                                      | 1.00     | 0.91 (0.82, 1.01) | 0.95 (0.79, 1.15) | 0.173         |
|                                               | <1/month | 1-3/month         | ≥1/week           | Trend P-value |
| <b>Dark fish (salmon, mackerel, bluefish)</b> |          |                   |                   |               |
| Number of participants                        | 59578    | 20817             | 4098              |               |
| Person-years                                  | 577541   | 205147            | 39773             |               |
| Number of HF events                           | 1416     | 379               | 63                |               |
| Incidence Rates (per 10,000 person-years)     | 24.5     | 18.5              | 15.8              |               |
| Model 1*                                      | 1.00     | 0.90 (0.80, 1.01) | 0.81 (0.63, 1.04) | 0.019         |
| Model 2†                                      | 1.00     | 0.89 (0.79, 1.00) | 0.79 (0.61, 1.02) | 0.011         |
| Model 3‡                                      | 1.00     | 0.89 (0.79, 1.00) | 0.78 (0.61, 1.02) | 0.012         |
|                                               | <1/month | 1-3/month         | ≥1/week           | Trend P-value |
| <b>Tuna fish</b>                              |          |                   |                   |               |
| Number of participants                        | 35842    | 39882             | 8769              |               |
| Person-years                                  | 346411   | 390854            | 85197             |               |
| Number of HF events                           | 814      | 867               | 177               |               |
| Incidence Rates (per 10,000 person-years)     | 23.5     | 22.2              | 20.8              |               |
| Model 1*                                      | 1.00     | 0.96 (0.87, 1.05) | 0.94 (0.80, 1.11) | 0.309         |
| Model 2†                                      | 1.00     | 0.95 (0.86, 1.05) | 0.92 (0.78, 1.09) | 0.228         |
| Model 3‡                                      | 1.00     | 0.95 (0.86, 1.05) | 0.92 (0.77, 1.09) | 0.233         |

\*age, ethnicity, education, physical activity, smoking, alcohol, diabetes, hypertension, AF, MI/CABG/PTCA, BMI, time-dependent MI

†Model 1 + fiber, fruit/vegetable servings, fried fish servings, saturated fat intake (%), DHA+EPA (%), linolenic acid (ALA, %), linoleic acid (%)

‡Model 2 + fried food servings, sodium intake (mg)

**Supplemental Table 6. Summary HR for Supplemental Figure.**

| Baked/Broiled      | Fried             | HR (95% CI)       | Interaction P-value |
|--------------------|-------------------|-------------------|---------------------|
| <1/month           | <1/month          | 1.00              | 0.216               |
| <1/month           | 1 month - <3/week | 0.93 (0.68, 1.27) |                     |
| <1/month           | ≥1/week           | 2.28 (1.38, 3.75) |                     |
| <1 month - <3/week | <1/month          | 0.95 (0.82, 1.10) |                     |
| <1 month - <3/week | 1 month - <3/week | 1.05 (0.89, 1.25) |                     |
| <1 month - <3/week | ≥1/week           | 1.29 (0.97, 1.72) |                     |
| ≥3/week            | <1/month          | 0.95 (0.77, 1.18) |                     |
| ≥3/week            | 1 month - <3/week | 0.88 (0.61, 1.25) |                     |
| ≥3/week            | ≥1/week           | 1.31 (0.86, 2.00) |                     |

**Supplemental Table 7. Multivariate hazard ratios for incident HF based on Caloric Adjusted DHA+EPA and ALA quartiles**

|                                     | Quartile 1 | Quartile 2        | Quartile 3        | Quartile 4        | Trend P-value |
|-------------------------------------|------------|-------------------|-------------------|-------------------|---------------|
| <b>DHA+EPA intake (g/1000 kcal)</b> | 0-0.02     | 0.021-0.04        | 0.041-0.07        | 0.071-0.17        |               |
| Number of participants              | 20962      | 21442             | 20945             | 21144             |               |
| Person-years                        | 201773     | 209077            | 205201            | 206411            |               |
| Number of CHF events                | 496        | 512               | 450               | 400               |               |
| Model 1*                            | 1.00       | 1.02 (0.90, 1.15) | 0.93 (0.82, 1.05) | 0.83 (0.73, 0.94) | 0.002         |
| Model 2†                            | 1.00       | 1.00 (0.89, 1.14) | 0.94 (0.83, 1.07) | 0.93 (0.81, 1.06) | 0.176         |
| Model 3‡                            | 1.00       | 1.00 (0.89, 1.14) | 0.95 (0.83, 1.08) | 0.94 (0.82, 1.08) | 0.266         |
| <b>ALA intake (g/1000 kcal)</b>     | 0.01-0.4   | 0.41-0.6          | 0.61-0.7          | 0.71-1.0          |               |
| Number of participants              | 21243      | 21169             | 21094             | 20987             |               |
| Person-years                        | 211467     | 207484            | 203963            | 199548            |               |
| Number of CHF events                | 422        | 457               | 474               | 505               |               |
| Model 1*                            | 1.0        | 1.08 (0.95, 1.23) | 1.10 (0.96, 1.25) | 1.16 (1.02, 1.32) | 0.026         |
| Model 2†                            | 1.0        | 1.00 (0.88, 1.14) | 1.00 (0.88, 1.14) | 1.03 (0.90, 1.17) | 0.706         |
| Model 3§                            | 1.0        | 1.00 (0.87, 1.14) | 1.00 (0.86, 1.16) | 1.05 (0.87, 1.25) | 0.668         |

\*Adjusted for age

†Model 1 + ethnicity, education, physical activity, smoking, alcohol, diabetes, hypertension, AF, MI/CABG/PTCA, BMI, time-dependent MI

‡Model 2 + fiber, fruit/vegetable servings, saturated fat intake (%), linolenic acid (ALA, %), linoleic acid (%)

§Model 2 + fiber, fruit/vegetable servings, saturated fat intake (%), DHA+EPA (%), linoleic acid (%)

**Supplemental Table 8. Multivariate hazard ratios for incident HF based on Unadjusted DHA+EPA and ALA quartiles**

|                             | Quartile 1 | Quartile 2        | Quartile 3        | Quartile 4        | Trend P-value |
|-----------------------------|------------|-------------------|-------------------|-------------------|---------------|
| <b>DHA+EPA intake (g/d)</b> | <0.048     | 0.048-0.092       | 0.093-0.163       | >0.163            |               |
| Number of participants      | 21013      | 21252             | 21051             | 21177             |               |
| Person-years                | 201315     | 207171            | 206859            | 207115            |               |
| Number of HF events         | 510        | 492               | 435               | 421               |               |
| Model 1*                    | 1.00       | 0.97 (0.86, 1.10) | 0.89 (0.78, 1.01) | 0.88 (0.77, 1.00) | 0.019         |
| Model 2†                    | 1.00       | 0.95 (0.84, 1.08) | 0.91 (0.80, 1.03) | 0.95 (0.83, 1.08) | 0.290         |
| Model 3‡                    | 1.00       | 0.94 (0.83, 1.07) | 0.89 (0.78, 1.02) | 0.93 (0.81, 1.06) | 0.186         |
| <b>ALA intake (g/d)</b>     | <0.711     | 0.711-1.019       | 1.020-1.465       | >1.465            |               |
| Number of participants      | 21238      | 21092             | 21155             | 21008             |               |
| Person-years                | 207053     | 207513            | 206828            | 201066            |               |
| Number of HF events         | 443        | 464               | 468               | 483               |               |
| Model 1*                    | 1.0        | 1.06 (0.93, 1.20) | 1.07 (0.94, 1.21) | 1.14 (1.01, 1.30) | 0.049         |
| Model 2†                    | 1.0        | 1.06 (0.93, 1.20) | 1.03 (0.90, 1.17) | 1.03 (0.90, 1.17) | 0.773         |
| Model 3§                    | 1.0        | 1.02 (0.89, 1.17) | 0.98 (0.84, 1.14) | 0.93 (0.77, 1.12) | 0.404         |

\*Adjusted for age

†Model 1 + ethnicity, education, physical activity, smoking, alcohol, diabetes, hypertension, AF, MI/CABG/PTCA, BMI, time-dependent MI

‡Model 2 + fiber, fruit/vegetable servings, saturated fat intake (%), linolenic acid (ALA, %), linoleic acid (%)

§Model 2 + fiber, fruit/vegetable servings, saturated fat intake (%), DHA+EPA (%), linoleic acid (%)

**Supplemental Table 9. Multivariate hazard ratios for incident HF based on Caloric Adjusted TFA quartiles**

|                                 | Quartile 1 | Quartile 2        | Quartile 3        | Quartile 4        | Trend P-value |
|---------------------------------|------------|-------------------|-------------------|-------------------|---------------|
| <b>TFA Intake (g/1000 kcal)</b> | 0.01-1.0   | 1.1-1.6           | 1.7-2.2           | 2.3-3.5           |               |
| Number of participants          | 21183      | 21148             | 21137             | 21025             |               |
| Person-years                    | 210997     | 207928            | 204348            | 199189            |               |
| Number of HF events             | 347        | 442               | 514               | 555               |               |
| Model 1*                        | 1.0        | 1.26 (1.10, 1.45) | 1.48 (1.29, 1.70) | 1.58 (1.38, 1.81) | <.001         |
| Model 2†                        | 1.0        | 1.11 (0.96, 1.28) | 1.16 (1.01, 1.33) | 1.12 (0.98, 1.29) | 0.124         |
| Model 3‡                        | 1.0        | 1.06 (0.91, 1.23) | 1.10 (0.94, 1.30) | 1.05 (0.88, 1.26) | 0.612         |

\*Adjusted for age

†Model 1 + ethnicity, education, physical activity, smoking, alcohol, diabetes, hypertension, AF, MI/CABG/PTCA, BMI, time-dependent MI

‡Model 2 + fiber, fruit/vegetable servings, saturated fat intake (%), linolenic acid (ALA, %), linoleic acid (%)

**Supplemental Table 10. Multivariate hazard ratios for incident HF based on Unadjusted TFA quartiles**

|                         | Quartile 1 | Quartile 2        | Quartile 3        | Quartile 4        | Trend P-value |
|-------------------------|------------|-------------------|-------------------|-------------------|---------------|
| <b>TFA Intake (g/d)</b> | <1.892     | 1.892-3.008       | 3.009-4.754       | >4.754            |               |
| Number of participants  | 21146      | 21143             | 21198             | 21006             |               |
| Person-years            | 207309     | 207762            | 206649            | 200740            |               |
| Number of HF events     | 416        | 412               | 462               | 568               |               |
| Model 1*                | 1.0        | 1.00 (0.87, 1.15) | 1.11 (0.97, 1.27) | 1.43 (1.26, 1.63) | <.001         |
| Model 2†                | 1.0        | 0.94 (0.82, 1.08) | 0.97 (0.85, 1.11) | 1.08 (0.95, 1.23) | 0.160         |
| Model 3‡                | 1.0        | 0.90 (0.77, 1.04) | 0.90 (0.77, 1.05) | 0.98 (0.82, 1.16) | 0.966         |

\*Adjusted for age

†Model 1 + ethnicity, education, physical activity, smoking, alcohol, diabetes, hypertension, AF, MI/CABG/PTCA, BMI, time-dependent MI

‡Model 2 + fiber, fruit/vegetable servings, saturated fat intake (%), linolenic acid (ALA, %), linoleic acid (%)

**Figure Legend**

**Supplemental Figure.** Multivariate-adjusted HR for incident HF based on the combination of baked/broiled fish and fried fish consumption.

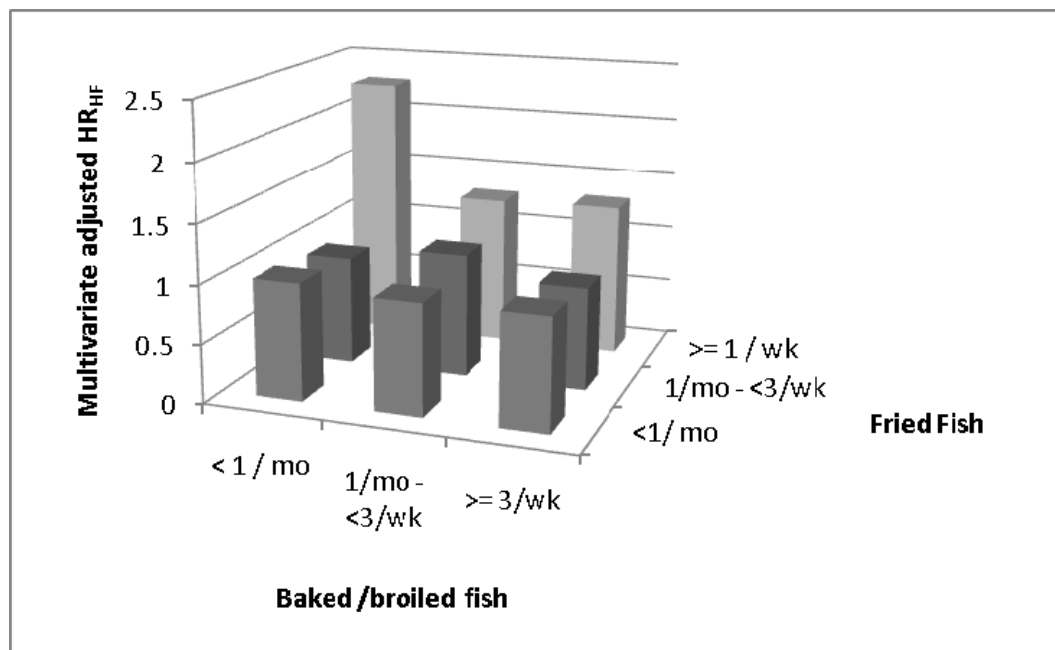

Supplement: NIHMS302916-supplement-Supp1.pdf [file NIHMS302916-supplement-Supp1.pdf]
